# Supplementary material
Source: Springer Nature journal article supplement (https://www.springermedizin.de/resource/supplementary/12885_2003_94_MOESM1_ESM.pdf/9468964)
Supplement: MOESM1 [file 9468964]

| SNP RS ID | Normal Tissue Major Allele Count | Normal Tissue Minor Allele Count | Tumor Tissue Major Allele Count | Tumor Tissue Minor Allele Count | Normal Tissue Major Allele | Normal Tissue Minor Allele | Tumor Tissue Major Allele | Tumor Tissue Minor Allele | P Value    | Amino Acid Change | Definition                                                                                                      |
|-----------|----------------------------------|----------------------------------|---------------------------------|---------------------------------|----------------------------|----------------------------|---------------------------|---------------------------|------------|-------------------|-----------------------------------------------------------------------------------------------------------------|
| 1124      | 37                               | 19                               | 19                              | 1                               | g                          | a                          | g                         | a                         | 0.00779175 | S->N              | surfactant protein-C                                                                                            |
| 2660      | 14                               | 14                               | 30                              | 8                               | a                          | g                          | g                         | a                         | 0.01076851 | R->G              | gb AAA39858.1  2--5- oligoadenylate synthetase                                                                  |
| 2791      | 78                               | 2                                | 54                              | 6                               | c                          | t                          | c                         | t                         | 0.00020622 | R->H              | heat shock protein 75 [Homo sapiens]                                                                            |
| 3271      | 154                              | 20                               | 60                              | 0                               | t                          | g                          | t                         |                           | 0.00562385 | K->R              | unnamed protein product [Homo sapiens]                                                                          |
| 3273      | 175                              | 1                                | 50                              | 2                               | g                          | c                          | g                         | c                         | 0.0016873  | R->R              | sp Q9Z204 ROC_MOUSE Heter                                                                                       |
| 4574      | 83                               | 63                               | 16                              | 12                              | t                          | c                          | t                         | c                         | 0          | V->A              | proteasome (prosome, macropain) subunit, beta type, 7 [Homo sapiens]                                            |
| 4591      | 126                              | 58                               | 57                              | 9                               | c                          | t                          | c                         | t                         | 0.00202668 | R->K              | ATP synthase, H+ transporting, mitochondrial F1 complex, O subunit (oligomycin sensitivity conferring protein); |
| 4652      | 72                               | 46                               | 14                              | 10                              | c                          | a                          | a                         | c                         | 0.04001459 | P->H              | mitogaligin [Homo sapiens]                                                                                      |
| 4731      | 144                              | 9                                | 22                              | 2                               | a                          | g                          | a                         | g                         | 0          | K->R              | squalene synthase [Mus musculus]                                                                                |
| 4864      | 30                               | 3                                | 23                              | 9                               | g                          | c                          | g                         | c                         | 0.0379944  | V->L              | unknown [Homo sapiens]                                                                                          |
| 4893      | 71                               | 1                                | 31                              | 5                               | a                          | g                          | a                         | g                         | 0.01418482 | I->V              | gb AAC51730.1  hematopoietic neural membrane protein                                                            |
| 6979      | 24                               | 16                               | 17                              | 3                               | a                          | g                          | a                         | g                         | 0.03504075 | V->A              | Similar to hypothetical protein 24432 [Homo sapiens]                                                            |
| 7089      | 33                               | 25                               | 22                              | 10                              | c                          | t                          | t                         | c                         | 0.01184025 | S->L              | unknown [Homo sapiens]                                                                                          |
| 7251      | 39                               | 15                               | 28                              | 20                              | g                          | c                          | g                         | c                         | 0.03530654 | E->D              | Unknown (protein for MGC:15293) [Homo sapiens]                                                                  |
| 7323      | 62                               | 20                               | 45                              | 5                               | g                          | c                          | g                         | c                         | 0.01978454 | V->L              | gb AAA21873.1  transcription factor IIIA                                                                        |
| 7338      | 101                              | 19                               | 39                              | 15                              | a                          | g                          | a                         | g                         | 0.01750799 | H->R              | HSPC254 [Homo sapiens]                                                                                          |
| 7391      | 112                              | 14                               | 205                             | 13                              | c                          | g                          | c                         | g                         | 0.016094   | A->G              | unnamed protein product [Homo sapiens]                                                                          |
| 7462      | 56                               | 28                               | 51                              | 9                               | c                          | t                          | c                         | t                         | 0.003002   | P->L              | Similar to hypothetical protein FLJ20643 [Homo sapiens]                                                         |
| 7501      | 18                               | 8                                | 14                              | 0                               | g                          | t                          | g                         |                           | 0.02031443 | R->L              | homeotic protein pG2 - human                                                                                    |
| 7567      | 21                               | 11                               | 37                              | 7                               | g                          | t                          | g                         | t                         | 0.01155307 | C->F              | Unknown (protein for IMAGE:3922955) [Homo sapiens]                                                              |
| 7824      | 28                               | 8                                | 18                              | 0                               | c                          | t                          | c                         |                           | 0.02908346 | A->V              | sp P50238 CRP1_HUMAN Cysteine-rich protein 1 (Cysteine-rich intestinal protein) (CRIP)                          |
| 7915      | 25                               | 5                                | 22                              | 16                              | a                          | c                          | a                         | c                         | 0.01688577 | Q->P              | MPFYVE [Homo sapiens]                                                                                           |
| 7917      | 29                               | 15                               | 30                              | 2                               | g                          | a                          | g                         | a                         | 0.00298339 | T->I              | gb AAH07654.1 AAH07654 Similar to NIF3 (Ngg1 interacting factor 3, S.pombe homolog)-like 1                      |
| 7975      | 49                               | 21                               | 6                               | 0                               | g                          | a                          | a                         |                           | 0.001354   | E->K              | gb AAB96392.1  glutathione transferase Zeta 1                                                                   |
| 8388      | 38                               | 26                               | 37                              | 7                               | c                          | t                          | c                         | t                         | 0.00105044 | V->I              | gb AAH32631.1  DC13 protein [Homo sapiens]                                                                      |
| 8424      | 177                              | 1                                | 126                             | 4                               | g                          | t                          | g                         | t                         | 0.00012622 | G->V              | similar to ribosomal protein L38, cytosolic [validated]                                                         |
| 8623      | 46                               | 6                                | 47                              | 1                               | c                          | t                          | c                         | t                         | 0.04280441 | P->L              | unnamed protein product [Homo sapiens]                                                                          |

|       |     |    |     |    |   |   |   |   |            |      |                                                                                                                                                      |
|-------|-----|----|-----|----|---|---|---|---|------------|------|------------------------------------------------------------------------------------------------------------------------------------------------------|
| 8875  | 61  | 17 | 27  | 15 | g | c | g | c | 0.03190049 | V->L | sp O95298 N4BM_HUMAN NADH-ubiquinone oxidoreductase subunit B14.5b (Complex I-B14.5b)                                                                |
| 9014  | 50  | 6  | 38  | 0  | c | g | c |   | 0.03987689 | P->A | ER-localized type I transmembrane adaptor precursor                                                                                                  |
| 9078  | 12  | 10 | 30  | 9  | c | a | c | a | 0.04614203 | P->Q | TBC1 domain family, member 3; Rab GTPase-activating protein PRC17; prostate cancer gene 17 [Homo sapiens]                                            |
| 9260  | 29  | 17 | 27  | 5  | g | a | g | a | 0.02486536 | V->M | Homo sapiens major histocompatibility complex, class II, DQ alpha 1 (HLA-DQA1), mRNA                                                                 |
| 9276  | 71  | 13 | 86  | 6  | g | a | g | a | 0.01862335 | R->Q | gb AAA63221.1  light chain                                                                                                                           |
| 9419  | 75  | 75 | 11  | 3  | c | a | a | c | 0.02820037 | A->E | Unknown (protein for MGC:27221) [Homo sapiens]                                                                                                       |
| 9888  | 123 | 1  | 51  | 3  | c | t | c | t | 9.76E-05   | S->F | Homo sapiens ATP synthase                                                                                                                            |
| 10618 | 37  | 25 | 11  | 5  | g | a | a | g | 0.0297166  | R->H | Chain A, Human 3alpha-Hsd Type 3 In Ternary Complex With Nadp And Testosterone                                                                       |
| 10684 | 107 | 5  | 65  | 12 | g | a | g | a | 2.44E-06   | R->K | Similar to fusion, derived from t(12;16) malignant liposarcoma [Mus musculus]                                                                        |
| 10827 | 278 | 1  | 156 | 4  | c | t | c | t | 5.88E-06   | L->F | gb AAH01032.1 AAH01032 ribosomal prot                                                                                                                |
| 10954 | 219 | 22 | 127 | 2  | c | g | c | g | 0.00293151 | P->P | 60S RIBOSOMAL PROTEIN L7                                                                                                                             |
| 11474 | 70  | 26 | 9   | 7  | a | t | t | a | 0.01784279 | Q->L | Chain A, Human 3alpha-Hsd Type 3 In Ternary Complex With Nadp And Testosterone                                                                       |
| 11695 | 27  | 5  | 10  | 8  | c | t | c | t | 0.02483176 | R->C | gb AAK38615.1 AF293076_1 putative magnesium transporter [Homo sapiens]                                                                               |
| 11959 | 121 | 1  | 47  | 3  | c | g | c | g | 4.97E-05   | P->A | gb AAH04441.1 AAH04441 Similar to po                                                                                                                 |
| 12064 | 233 | 1  | 140 | 3  | a | t | a | t | 0.00221356 | K->K | similar to 60S RIBOSOMAL PROTEIN L17 (L23) (AMINO ACID STARVATION-INDUCED PROTEIN)                                                                   |
| 12702 | 39  | 5  | 27  | 11 | a | g | a | g | 0.03130994 | S->P | gb AAH19262.2  Unknown (protein for MGC:2632)                                                                                                        |
| 12841 | 100 | 4  | 50  | 12 | c | g | c | g | 2.33E-10   | P->R | unnamed protein product [Homo sapiens]                                                                                                               |
| 13003 | 266 | 37 | 133 | 32 | c | t | c | t | 0.0050521  | A->T | gb AAA69923.1  60S ribosomal protein                                                                                                                 |
| 13021 | 62  | 4  | 31  | 15 | a | g | a | g | 5.15E-14   | S->G | gb AAB48304.1  pinin [Homo sapiens]                                                                                                                  |
| 13105 | 78  | 2  | 65  | 7  | t | a | t | a | 8.99E-05   | V->D | Homo sapiens karyopherin alpha 2 (RAG cohort 1, importin alpha 1)                                                                                    |
| 13269 | 61  | 3  | 38  | 6  | c | t | c | t | 0.00522807 | S->L | unknown [Homo sapiens]                                                                                                                               |
| 13294 | 20  | 14 | 24  | 10 | a | g | g | a | 0.01021057 | S->G | gb AAB88082.1  extracellular matrix protein 1                                                                                                        |
| 13441 | 52  | 6  | 27  | 12 | g | a | g | a | 0.00942524 | V->I | hypothetical protein [Homo sapiens]                                                                                                                  |
| 13571 | 59  | 22 | 42  | 6  | g | c | g | c | 0.02504702 | C->S | ribosomal protein L2 [Homo sapiens]                                                                                                                  |
| 13807 | 217 | 1  | 121 | 3  | c | t | c | t | 0.0012455  | T->I | ubiquitin-like protein fubi and ribosomal protein S30 precursor; FBR-MuSV-associated ubiquitously expressed gene; ubiquitin-like-S30 fusion protein; |
| 13963 | 24  | 10 | 6   | 2  | a | g | g | a | 0.02205029 | S->G | The C-Type Lectin Carbohydrate Recognition Domain Of Human Tetranectin                                                                               |

|        |     |    |     |    |   |   |   |   |            |      |                                                                                                                                                                  |
|--------|-----|----|-----|----|---|---|---|---|------------|------|------------------------------------------------------------------------------------------------------------------------------------------------------------------|
| 14009  | 295 | 3  | 183 | 9  | c | a | c | a | 3.30E-07   | P->Q | sp P47914 RL29_HUMAN 60S riboso                                                                                                                                  |
| 14292  | 198 | 1  | 82  | 2  | t | c | t | c | 0.01503636 | L->R | gb AAK95214.1 AF402840_1 40S ribosomal protein S29 [Ictalurus punctatus]                                                                                         |
| 14408  | 86  | 72 | 52  | 16 | c | t | c | t | 0.0003252  | T->M | sp Q01629 IFM2_HUMAN Interferon-induced transmembrane protein 2 (Interferon-inducible protein 1-8D)                                                              |
| 14602  | 195 | 1  | 138 | 4  | a | g | a | g | 0.00011558 | K->E | similar to ribosomal protein L38, cytosolic [validated]                                                                                                          |
| 17570  | 22  | 20 | 8   | 0  | c | t | c |   | 0.01090177 | L->F | Homo sapiens peptidase D [synthetic construct]                                                                                                                   |
| 17587  | 21  | 17 | 16  | 0  | g | a | g |   | 0.00061037 | R->H | proteasome endopeptidase complex (EC 3.4.25.1) - human                                                                                                           |
| 25679  | 32  | 4  | 12  | 10 | c | a | c | a | 0.00375539 | Q->K | Homo sapiens CD68 antigen (CD68), mRNA                                                                                                                           |
| 180828 | 18  | 12 | 21  | 13 | a | g | g | a | 0.04516615 | M->V | similar to 5133400C09Rik protein [Homo sapiens]                                                                                                                  |
| 218741 | 231 | 14 | 198 | 5  | g | a | g | t | 0.0005492  | N->K | unnamed protein product [Homo sapiens]                                                                                                                           |
| 323835 | 160 | 48 | 89  | 43 | g | a | g | a | 0.010265   | A->T | unnamed protein product [Homo sapiens]                                                                                                                           |
| 343320 | 39  | 1  | 37  | 4  | c | t | c | t | 0.0030322  | H->Y | (Ca(2+)-dependent phospholipid scramblase 1) (Erythrocyte phospholipid scramblase) (MmTRA1b)                                                                     |
| 404970 | 20  | 4  | 6   | 2  | g | a | a | g | 0.00461196 | V->I | sp P02538 K2CA_HUMAN Keratin, type II cytoskeletal 6A (Cytokeratin 6A) (CK 6A) (K6A keratin)                                                                     |
| 409447 | 25  | 15 | 16  | 8  | g | c | c | a | 7.22E-06   | E->Q | gb AAH07488.1 AAH07488 Unknown (protein for MGC:15057) [Homo sapiens]                                                                                            |
| 449000 | 46  | 18 | 10  | 10 | g | t | t | g | 0.04352415 | S->I | gb AAH07488.1 AAH07488 Unknown (protein for MGC:15057) [Homo sapiens]                                                                                            |
| 452623 | 74  | 12 | 8   | 6  | c | t | c | t | 0.01497384 | P->L | hypothetical protein DKFZp434K1323.1 - human (fragment)                                                                                                          |
| 470428 | 30  | 6  | 22  | 0  | t | c | t |   | 0.04812291 | T->A | gb AAA35412.1  haptoglobin                                                                                                                                       |
| 482967 | 227 | 91 | 141 | 79 | c | t | c | t | 0.01768314 | R->Q | unnamed protein product [Homo sapiens]                                                                                                                           |
| 562047 | 71  | 5  | 14  | 6  | c | g | c | g | 0.00811993 | D->E | Chain A, Heat-Shock 70kd Protein 42kd Atpase N-Terminal Domain similar to dJ612B15.1 (novel protein similar to 60S ribosomal protein L17 (RPL17)) [Homo sapiens] |
| 566334 | 220 | 2  | 122 | 8  | c | t | c | t | 2.38E-10   | E->K |                                                                                                                                                                  |
| 621679 | 17  | 17 | 6   | 0  | a | g | g |   | 0.02629938 | T->A | gb AAA59534.1                                                                                                                                                    |
| 644706 | 30  | 4  | 36  | 2  | a | g | a | t | 0.0505794  | S->G | similar to Keratin, type I cytoskeletal 14 (Cytokeratin 14) (K14) (CK 14) [Homo sapiens]                                                                         |
| 699597 | 251 | 1  | 119 | 2  | c | g | c | g | 0.02814168 | A->A | similar to ribosomal protein L14; 60S ribosomal protein L14 [Homo sapiens]                                                                                       |
| 701564 | 38  | 6  | 30  | 12 | g | a | g | a | 0.00525697 | R->H | MHC class II HLA-DQ-beta-1                                                                                                                                       |
| 701829 | 83  | 20 | 81  | 8  | g | a | g | a | 0.01382636 | V->M | MHC class II antigen HLA-DR-beta 1 [Homo sapiens]                                                                                                                |
| 704839 | 24  | 4  | 60  | 24 | a | g | a | g | 0.00019939 | E->G | unnamed protein product [Mus musculus]                                                                                                                           |
| 707908 | 98  | 62 | 81  | 55 | g | c | c | g | 7.53E-07   | E->Q | MHC class I [Pongo pygmaeus]                                                                                                                                     |

|         |     |    |    |    |   |   |   |   |            |      |                                                                                                                                                |
|---------|-----|----|----|----|---|---|---|---|------------|------|------------------------------------------------------------------------------------------------------------------------------------------------|
| 707910  | 130 | 19 | 32 | 0  | g | a | g |   | 0          | R->K | The nucleotide sequence of A*0215N is the same as that of A*0207 except for a single nucleotide substitution which resulted in a stop codon in |
| 707955  | 55  | 5  | 14 | 8  | t | c | t | c | 0.00391482 | Y->H | gb AAA59693.1  MHC class II DR-beta-1                                                                                                          |
| 707957  | 31  | 26 | 16 | 6  | a | c | a | t | 0.00028515 | Y->S | major histocompatibility class II antigen [Homo sapiens]                                                                                       |
| 708637  | 64  | 32 | 19 | 1  | t | g | t | g | 0.00599797 | I->S | similar to CG13176-PA [Homo sapiens]                                                                                                           |
| 708638  | 63  | 6  | 47 | 11 | g | c | g | c | 0.00584627 | E->D | unknown [Homo sapiens]                                                                                                                         |
| 709932  | 60  | 12 | 15 | 9  | g | a | g | a | 0.0256751  | R->H | alpha-1-antitrypsin                                                                                                                            |
| 713031  | 126 | 39 | 31 | 6  | g | t | g | t | 0          | A->S | MHC class I Patr-B*06                                                                                                                          |
| 713032  | 83  | 56 | 27 | 11 | a | t | a | t | 0          | Y->F | gb AAA52665.1  transplantation antigen                                                                                                         |
| 829867  | 23  | 11 | 12 | 6  | a | g | g | a | 0.01505119 | K->E | unnamed protein product [Homo sapiens]                                                                                                         |
| 856093  | 13  | 1  | 2  | 0  | c | t | t |   | 0.025      | A->V | pot. ORF VI [Homo sapiens]                                                                                                                     |
| 857663  | 61  | 23 | 19 | 19 | c | t | t | c | 0.0090904  | P->L | similar to HC6 [Homo sapiens]                                                                                                                  |
| 859208  | 68  | 2  | 6  | 2  | g | c | g | c | 0.04740523 | Q->H | TPA: aflatoxin B1-aldehyde reductase; AFAR [Homo sapiens]                                                                                      |
| 1042117 | 46  | 18 | 26 | 2  | t | a | t | a | 0.01630623 | F->Y | sp P04440 HB2P_HUMAN HLA class II histocompatibility antigen, DP(W4) beta chain precursor pir                                                  |
| 1042133 | 58  | 6  | 20 | 8  | g | c | g | c | 0.01849535 | E->D | sp P04440 HB2P_HUMAN HLA class II histocompatibility antigen, DP(W4) beta chain precursor pir                                                  |
| 1042136 | 55  | 3  | 14 | 4  | a | c | a | c | 0.04318901 | I->L | sp P04440 HB2P_HUMAN HLA class II histocompatibility antigen, DP(W4) beta chain precursor pir                                                  |
| 1042140 | 29  | 27 | 16 | 4  | a | g | a | g | 0.01866591 | K->E | sp P04440 HB2P_HUMAN HLA class II histocompatibility antigen, DP(W4) beta chain precursor pir                                                  |
| 1042335 | 34  | 34 | 51 | 21 | t | c | c | t | 0.00050685 | I->T | sp P04440 HB2P_HUMAN HLA class II histocompatibility antigen, DP(W4) beta chain precursor pir                                                  |
| 1042434 | 56  | 28 | 62 | 18 | c | g | c | g | 0.04372402 | A->A | antigen HLA DAalpha                                                                                                                            |
| 1042917 | 34  | 14 | 10 | 6  | g | a | a | g | 0.01540968 | R->H | collagen alpha 2(VI) chain precursor, long splice form                                                                                         |
| 1043446 | 54  | 10 | 14 | 10 | a | c | a | c | 0.00966383 | I->L | NADP-dependent retinol dehydrogenase short isoform                                                                                             |
| 1043478 | 36  | 9  | 23 | 9  | g | t | g | a | 0.01798218 | G->E | AG02 [Homo sapiens]                                                                                                                            |
| 1043758 | 41  | 3  | 20 | 6  | t | g | t | g | 0.04688606 | Y->D | AG1 [Homo sapiens]                                                                                                                             |
| 1043886 | 44  | 6  | 34 | 14 | a | c | a | c | 0.00027905 | Q->P | hypothetical protein FLJ12118 [Homo sapiens]                                                                                                   |
| 1044184 | 46  | 2  | 2  | 2  | c | a | c | a | 0.02499954 | H->N | Homo sapiens quinolinate phosphoribosyltransferase                                                                                             |
| 1044641 | 60  | 2  | 37 | 7  | a | c | a | c | 2.05E-06   | T->P | glyceronephosphate O-acyltransferase [Homo sapiens]                                                                                            |
| 1044921 | 31  | 21 | 25 | 7  | t | c | c | t | 0.00056116 | W->R | Williams Beuren syndrome chromosome region 20C isoform 1 [Homo sapiens]                                                                        |
| 1044928 | 26  | 24 | 24 | 4  | g | a | a | g | 0.00072366 | V->M | Williams Beuren syndrome chromosome region 20C isoform 1 [Homo sapiens]                                                                        |

|         |     |    |     |    |   |   |   |   |            |      |                                                                                                                                                                                    |
|---------|-----|----|-----|----|---|---|---|---|------------|------|------------------------------------------------------------------------------------------------------------------------------------------------------------------------------------|
| 1044929 | 30  | 28 | 18  | 6  | c | t | t | c | 0.01684539 | R->C | gb AAH07488.1 AAH07488 Unknown (protein for MGC:15057) [Homo sapiens]                                                                                                              |
| 1045141 | 51  | 5  | 44  | 0  | c | a | c |   | 0.03990486 | H->Q | gb AAH28904.1  chromosome 12 open reading frame 10 [Homo sapiens]                                                                                                                  |
| 1045320 | 41  | 23 | 7   | 3  | c | t | t | c | 0.03753045 | R->W | similar to hypothetical protein [Homo sapiens]                                                                                                                                     |
| 1045321 | 32  | 30 | 10  | 2  | t | c | t | c | 0.03325891 | W->R | Unknown (protein for MGC:15165) [Homo sapiens]                                                                                                                                     |
| 1045323 | 32  | 30 | 10  | 2  | g | a | g | a | 0.03325891 | W->* | Unknown (protein for MGC:15165) [Homo sapiens]                                                                                                                                     |
| 1045576 | 51  | 12 | 47  | 5  | c | t | c | g | 0.00099863 | L->L | hypothetical protein [Homo sapiens]                                                                                                                                                |
| 1045587 | 61  | 11 | 48  | 16 | c | t | c | t | 0.03266068 | A->V | Unknown (protein for MGC:52000) [Homo sapiens]                                                                                                                                     |
| 1045656 | 67  | 1  | 32  | 4  | g | a | g | a | 0.04355622 | E->K | LYST-interacting protein LIP4 [Homo sapiens]                                                                                                                                       |
| 1045944 | 89  | 1  | 49  | 5  | g | a | g | a | 1.16E-08   | E->K | gb AAH09866.1 AAH09866 Unknown (protein for MGC:16393) [Homo sapiens]                                                                                                              |
| 1046097 | 27  | 17 | 14  | 8  | a | g | g | a | 0.03425831 | M->V | gb AAH09670.1 AAH09670 tubulin, gamma 2 [Homo sa                                                                                                                                   |
| 1047291 | 27  | 7  | 30  | 0  | a | c | a |   | 0.00865981 | Y->S | light chain of factor I [Homo sapiens]                                                                                                                                             |
| 1048030 | 346 | 18 | 137 | 13 | g | t | g | t | 0.03631074 | C->F | laminin receptor homolog [Homo sapiens]                                                                                                                                            |
| 1048889 | 58  | 2  | 29  | 5  | c | t | c | t | 0.0481164  | P->L | gb AAL85336.1 AF478457_1 ATP-dependent RNA helicase [Homo sapiens]                                                                                                                 |
| 1049100 | 22  | 10 | 24  | 2  | g | a | g | a | 0.02351043 | V->I | Chain B, Crystal Structure Of A Human Insulin Peptide-Hla-Dq8 Complex                                                                                                              |
| 1049330 | 87  | 21 | 23  | 13 | c | g | c | g | 0.02401379 | R->G | similar to RIKEN cDNA 1810060K07 [Mus musculus]                                                                                                                                    |
| 1049336 | 357 | 26 | 295 | 11 | t | g | t | g | 0.0268688  | L->W | ferritin, heavy polypeptide 1 [Homo sapiens] emb CAA25086.1  apoferritin H chain [Homo sapiens]                                                                                    |
| 1049431 | 103 | 21 | 36  | 20 | c | g | c | g | 0.00020145 | A->G | sp Q15388 OM20_HUMAN Mitochondrial import receptor subunit TOM20 homolog (Mitochondrial 20 kDa outer membrane protein)                                                             |
| 1049453 | 103 | 17 | 40  | 18 | t | c | t | c | 0.00025435 | V->A | Chain A, Solution Nmr Structure Of The Mitochondrial Protein Import Receptor Tom20 From Rat In A Complex With A Presequence Peptide Derived From Rat Aldehyde Dehydrogenase (Aldh) |
| 1049475 | 106 | 18 | 43  | 18 | c | t | c | t | 0.00097298 | P->L | Similar to RIKEN cDNA 1810060K07 gene [Xenopus laevis]                                                                                                                             |
| 1049825 | 36  | 4  | 12  | 10 | t | c | c | t | 0.0002162  | I->T | Chain A, Role Of Ethe Mobile Loop In The Mehanism Of Human Salivary Amylase                                                                                                        |
| 1049874 | 40  | 36 | 24  | 6  | g | a | g | a | 0.00573682 | V->I | sp Q13510 ASAH_HUMAN Acid ceramidase precursor                                                                                                                                     |
| 1050043 | 175 | 5  | 79  | 7  | g | a | g | a | 0.00255238 | R->K | Homo sapiens CD63 antigen (melanoma 1 antigen) [synthetic construct]                                                                                                               |
| 1050118 | 99  | 38 | 94  | 52 | g | a | g | a | 0.03561508 | V->M | gb AAA59847.1  exons 2-8                                                                                                                                                           |
| 1050147 | 100 | 5  | 112 | 12 | c | t | c | t | 0.0104475  | A->V | MHC class I antigen [Homo sapiens]                                                                                                                                                 |
| 1050180 | 190 | 40 | 214 | 26 | g | a | g | a | 0.00768133 | V->M | gb AAA59847.1  exons 2-8                                                                                                                                                           |
| 1050241 | 139 | 25 | 139 | 11 | g | a | g | a | 0.00739801 | V->M | gb AAA70051.1  histocompatibility antigen                                                                                                                                          |
| 1050329 | 96  | 2  | 70  | 4  | c | t | c | t | 0.04140365 | S->F | gb AAA36396.1  ORF                                                                                                                                                                 |

|         |     |    |     |    |   |   |   |   |            |      |                                                                                                             |
|---------|-----|----|-----|----|---|---|---|---|------------|------|-------------------------------------------------------------------------------------------------------------|
| 1050379 | 83  | 71 | 24  | 14 | c | t | c | t | 0          | H->Y | HLA-B*40 [Homo sapiens]                                                                                     |
| 1050408 | 128 | 2  | 68  | 4  | c | t | c | t | 0.00573141 | P->L | short heat shock protein 60 Hsp60s2 [Homo sapiens]                                                          |
| 1050450 | 121 | 51 | 57  | 43 | c | t | c | t | 0.00384339 | P->L | glutathione peroxidase [Homo sapiens]                                                                       |
| 1050654 | 135 | 87 | 41  | 33 | c | a | a | c | 0.00493145 | R->S | HLA class I histocompatibility antigen, B-35 B*3504 alpha chain precursor                                   |
| 1051147 | 232 | 8  | 142 | 16 | a | c | a | c | 2.04E-06   | H->P | PNAS-101 [Homo sapiens]                                                                                     |
| 1051334 | 25  | 13 | 35  | 8  | t | g | t | g | 0.03542484 | S->A | Similar to transmembrane 4 superfamily member 3                                                             |
| 1051474 | 13  | 7  | 15  | 1  | t | c | t | c | 0.0409883  | H->R | gb AAG43365.1 AF153415_1 chromosome 9 open reading frame 5 [Homo sapiens]                                   |
| 1051648 | 30  | 20 | 28  | 6  | c | t | c | t | 0.0181296  | R->C | gb AAF36166.1 AF151080_1 HSPC246 [Homo sapiens]                                                             |
| 1052056 | 45  | 7  | 19  | 11 | c | t | c | t | 0.01248956 | L->F | Putative alpha-mannosidase C20orf31 precursor                                                               |
| 1052643 | 36  | 6  | 19  | 11 | c | t | c | t | 0.02113361 | S->F | hypothetical protein DKFZp434N0810.1 - human (fragment)                                                     |
| 1053490 | 71  | 5  | 53  | 11 | c | g | c | g | 0.00065611 | R->G | Homo sapiens glycoprotein, synaptic 2                                                                       |
| 1053534 | 20  | 2  | 11  | 7  | t | c | c | t | 0.00061092 | V->A | Unknown (protein for MGC:57796) [Homo sapiens]                                                              |
| 1053683 | 129 | 3  | 51  | 7  | c | t | c | t | 5.84E-07   | S->F | gb AAD21026.1 divalent cation tolerant protein CUTA [Homo sapiens] emb CAB63779.1                           |
| 1054392 | 58  | 2  | 4   | 4  | g | a | a | g | 0.00113199 | E->K | sp Q14807 KF22_HUMAN Kinesin-like protein KIF22 (Kinesin-like DNA-binding protein) (Kinesin-like protein 4) |
| 1056120 | 15  | 11 | 15  | 7  | c | g | g | c | 0.04811461 | L->V | Nuclear envelope pore membrane protein POM 121 (Pore membrane protein of 121 kDa) (P145)                    |
| 1056814 | 53  | 15 | 21  | 1  | t | c | t | c | 0.04546644 | I->V | gb AAK15585.1 AF228708_1 DiGeorge syndrome critical region 6-like protein [Homo sapiens]                    |
| 1056818 | 52  | 20 | 20  | 0  | c | g | c |   | 0.00373748 | L->V | gb AAK15585.1 AF228708_1 DiGeorge syndrome critical region 6-like protein [Homo sapiens]                    |
| 1058060 | 419 | 5  | 326 | 8  | a | c | a | c | 0.03980429 | K->N | Similar to tumor protein, translationally-controlled 1 [Homo sapiens]                                       |
| 1058143 | 47  | 29 | 34  | 8  | c | t | c | t | 0.01277052 | T->M | hypothetical protein XP_211052 [Homo sapiens]                                                               |
| 1058718 | 19  | 1  | 2   | 0  | g | a | a |   | 0.01298701 | E->K | gb AAA60208.1 pregnancy-specific beta-1-glycoprotein 4                                                      |
| 1058953 | 369 | 16 | 153 | 17 | c | g | c | g | 0.00013886 | R->G | 60S ribosomal protein L13A                                                                                  |
| 1059135 | 85  | 53 | 61  | 56 | t | c | t | c | 0.03870555 | I->T | LOC339047 protein [Homo sapiens]                                                                            |
| 1059228 | 280 | 11 | 149 | 19 | c | g | c | g | 3.23E-07   | L->V | similar to ribosomal protein L18a, cytosolic [validated]                                                    |
| 1059454 | 87  | 3  | 190 | 2  | a | c | a | t | 0.01067519 | T->P | C-terminal propeptide domain [Homo sapiens]                                                                 |
| 1059558 | 60  | 2  | 23  | 10 | g | a | g | a | 0.00032023 | G->S | similar to Importin alpha-2 subunit (Karyopherin alpha-2 subunit) (SRP1-alpha) (RAG cohort protein 1)       |
| 1059569 | 37  | 13 | 12  | 0  | t | a | t |   | 0.04271166 | F->Y | MHC class II antigen [Homo sapiens]                                                                         |
| 1059632 | 155 | 19 | 95  | 49 | g | t | g | t | 1.11E-16   | A->S | MHC class I antigen [Pan troglodytes]                                                                       |

|         |     |    |     |    |   |   |   |   |            |      |                                                                                                                                                  |
|---------|-----|----|-----|----|---|---|---|---|------------|------|--------------------------------------------------------------------------------------------------------------------------------------------------|
| 1059688 | 188 | 25 | 62  | 2  | g | t | g | t | 0.03411588 | V->L | gb AAA30421.1  calpactin I                                                                                                                       |
| 1059699 | 80  | 10 | 141 | 32 | g | c | g | c | 0.00208385 | V->L | MHC class II HLA-DR2 [Homo sapiens]                                                                                                              |
| 1059828 | 35  | 9  | 6   | 4  | g | a | a | g | 0.01720242 | S->L | cell division cycle 2-like 1 (PITSLRE proteins) isoform 9; cell division cycle 2-like 1; PITSLRE protein kinase alpha; [Homo sapiens]            |
| 1059834 | 254 | 3  | 144 | 12 | a | g | a | g | 3.36E-14   | E->G | gb AAA61182.1  prothymosin alpha1                                                                                                                |
| 1060126 | 29  | 9  | 8   | 8  | t | g | t | g | 0.04449227 | F->V | HDCMA39P [Homo sapiens]                                                                                                                          |
| 1060556 | 227 | 15 | 102 | 16 | a | c | a | c | 0.00095102 | T->P | similar to ribosomal protein L10a [Mus musculus]                                                                                                 |
| 1061520 | 75  | 29 | 8   | 4  | a | g | g | a | 0.00843388 | K->E | Similar to succinate dehydrogenase complex, subunit A, flavoprotein (Fp) [Homo sapiens]                                                          |
| 1061543 | 245 | 1  | 118 | 2  | c | t | c | t | 0.03022626 | L->F | similar to ribosomal protein L30 [Bos taurus]                                                                                                    |
| 1062368 | 274 | 9  | 132 | 18 | a | c | a | c | 7.81E-10   | T->P | ribosomal protein L10a [Homo sapiens]                                                                                                            |
| 1062390 | 250 | 8  | 125 | 12 | g | a | g | a | 0.00013707 | E->K | alpha-tubulin (partial)                                                                                                                          |
| 1062403 | 172 | 4  | 113 | 13 | a | c | a | c | 1.43E-09   | T->P | gb AAA84382.1  elongation factor 1 delta                                                                                                         |
| 1062413 | 27  | 17 | 10  | 2  | a | g | g | a | 0.00613402 | M->V | similar to Protein pM5 precursor [Homo sapiens]                                                                                                  |
| 1062422 | 278 | 12 | 135 | 11 | c | t | c | t | 0.04014005 | S->F | gb AAA69923.1  60S ribosomal protein                                                                                                             |
| 1062425 | 196 | 4  | 104 | 12 | t | a | t | a | 1.42E-10   | L->Q | similar to ribosomal protein L37a, cytosolic [validated]                                                                                         |
| 1062438 | 297 | 27 | 165 | 27 | c | t | c | t | 0.0042147  | S->F | gb AAA69923.1  60S ribosomal protein                                                                                                             |
| 1062482 | 62  | 2  | 55  | 7  | g | c | g | c | 0.00022929 | S->T | sulfotransferase family, cytosolic, 1A, phenol-preferring, member 2; thermostable phenol sulfotransferase; phenolic-metabolizing (P) form of PST |
| 1062713 | 117 | 7  | 80  | 18 | a | g | a | g | 5.18E-08   | K->R | Homo sapiens jumping translocation breakpoint                                                                                                    |
| 1063087 | 40  | 4  | 12  | 6  | c | a | c | a | 0.02343849 | D->E | unknown protein [Homo sapiens]                                                                                                                   |
| 1063108 | 240 | 7  | 128 | 9  | g | a | g | a | 0.00859497 | E->K | 60S RIBOSOMAL PROTEIN L7                                                                                                                         |
| 1063323 | 22  | 12 | 14  | 8  | g | a | a | g | 0.02638209 | A->T | Chain B, Crystal Structure Of A Human Insulin Peptide-Hla-Dq8 Complex                                                                            |
| 1063607 | 135 | 1  | 94  | 6  | a | c | a | c | 7.36E-10   | T->P | cytokeratin 18 (232 AA) [Homo sapiens]                                                                                                           |
| 1063730 | 231 | 2  | 73  | 3  | c | t | c | t | 0.00356374 | P->L | similar to basic transcription factor 3                                                                                                          |
| 1064682 | 63  | 1  | 52  | 4  | a | c | a | c | 0.00078106 | T->P | sulfotransferase family, cytosolic, 1A, phenol-preferring, member 3; thermolabile phenol sulfotransferase;                                       |
| 1064728 | 222 | 13 | 92  | 26 | c | g | c | g | 4.88E-15   | L->V | sp P02433 RL32_HUMAN 60S ribosomal protein L32                                                                                                   |
| 1064792 | 283 | 7  | 183 | 11 | a | c | a | c | 0.00318039 | V->G | Very hypothetical protein                                                                                                                        |
| 1064823 | 201 | 74 | 92  | 54 | t | a | t | a | 0.0065125  | S->T | tubulin, alpha 4; tubulin alpha 4 [Mus musculus] ref NP_005991.1  tubulin, alpha 1                                                               |
| 1065037 | 289 | 4  | 183 | 9  | c | t | c | t | 7.40E-05   | R->* | sp P47914 RL29_HUMAN 60S riboso                                                                                                                  |
| 1065059 | 4   | 4  | 10  | 2  | t | g | t | c | 0.02287582 | W->R | H.sapiens (HC15-1) DNA for immunoglobulin heavy chain variable region.                                                                           |

|         |     |    |     |    |   |   |   |   |            |      |                                                                                                                                           |
|---------|-----|----|-----|----|---|---|---|---|------------|------|-------------------------------------------------------------------------------------------------------------------------------------------|
| 1065411 | 33  | 11 | 16  | 10 | c | g | g | c | 0.00223727 | N->K | Chain A, Ligand-Free Human Glutathione S-Transferase M1a-1a                                                                               |
| 1065718 | 277 | 64 | 173 | 67 | a | g | a | g | 0.00030111 | I->V | alpha-tubulin (partial)                                                                                                                   |
| 1071645 | 36  | 32 | 22  | 8  | a | g | a | g | 0.03016978 | M->V | PHP; putative heart protein [Homo sapiens]                                                                                                |
| 1071649 | 158 | 28 | 27  | 15 | c | a | c | a | 0.00020512 | L->I | gb AAA59847.1  exons 2-8                                                                                                                  |
| 1071650 | 116 | 49 | 28  | 6  | t | g | t | g | 0          | Y->D | HLA-Cw*0801 [Homo sapiens]                                                                                                                |
| 1071739 | 60  | 59 | 11  | 4  | c | t | t | a | 0.00074456 | S->F | HLA-Cw*0801 [Homo sapiens]                                                                                                                |
| 1071743 | 83  | 39 | 28  | 6  | a | c | a | g | 7.72E-05   | I->L | unnamed protein product [Homo sapiens]                                                                                                    |
| 1071759 | 112 | 5  | 184 | 0  | g | a | g |   | 0.0042564  | R->K | MHC class II HLA-DR2 [Homo sapiens]                                                                                                       |
| 1126557 | 72  | 4  | 46  | 6  | a | g | a | g | 0.04428472 | D->G | Similar to succinate dehydrogenase complex, subunit A, flavoprotein (Fp) [Homo sapiens]                                                   |
| 1126599 | 87  | 8  | 57  | 12 | t | c | t | c | 0.00768518 | Y->H | Similar to succinate dehydrogenase complex, subunit A, flavoprotein (Fp) [Homo sapiens]                                                   |
| 1126605 | 37  | 9  | 24  | 0  | g | a | g |   | 0.01694074 | E->K | gb AAH35220.1  similar to complement component                                                                                            |
| 1126687 | 110 | 4  | 66  | 6  | g | a | g | a | 0.02680079 | G->S | succinate dehydrogenase flavoprotein subunit [Macaca fascicularis]                                                                        |
| 1126821 | 39  | 9  | 20  | 12 | t | a | t | a | 0.03748958 | L->M | gamma-catenin [Homo sapiens]                                                                                                              |
| 1127233 | 8   | 2  | 14  | 8  | a | c | c | a | 0.02393964 | R->S | gb AAK56861.1 AF286113_1 transmembrane mucin MUC13 [Homo sapiens]                                                                         |
| 1127618 | 123 | 5  | 25  | 9  | g | t | g | t | 0.00025149 | W->L | sp O14957 UCRY_HUMAN Ubiquinol-cytochrome C reductase complex 6.4 kDa protein (Complex III subunit XI)                                    |
| 1127787 | 46  | 10 | 20  | 0  | g | a | g |   | 0.03730336 | G->R | mitochondrial ribosomal protein S35; MDS023 protein; mitochondrial ribosomal protein S28 [Homo sapiens]                                   |
| 1128362 | 55  | 7  | 6   | 4  | c | t | c | t | 0.03417189 | H->Y | Rab9 effector p40 [Homo sapiens] emb CAB09808.1  p40 [Homo sapiens]                                                                       |
| 1128625 | 258 | 16 | 153 | 20 | c | g | c | g | 0.00137447 | R->G | Unknown (protein for MGC:20328) [Homo sapiens]                                                                                            |
| 1128814 | 127 | 7  | 35  | 3  | c | a | c | a | 0          | Q->K | gb AAH32717.1  MUM2 protein [Homo sapiens]                                                                                                |
| 1129923 | 41  | 7  | 26  | 0  | g | a | g |   | 0.04091461 | G->S | hypothetical protein FLJ20442 [Homo sapiens]                                                                                              |
| 1129957 | 27  | 24 | 34  | 12 | g | c | g | c | 0.00541635 | E->Q | MHC class II HLA-DQ-alpha chain                                                                                                           |
| 1129963 | 40  | 18 | 33  | 29 | g | a | g | a | 0.00836295 | A->T | MHC class II HLA-DQ-alpha chain                                                                                                           |
| 1130409 | 54  | 42 | 12  | 4  | t | g | g | t | 0.01529244 | D->E | The Crystal Structure Of The Human Dna Repair Endonuclease Hap1 Suggests The Recognition Of Extra-Helical Deoxyribose At Dna Abasic Sites |
| 1130426 | 63  | 45 | 11  | 3  | c | t | t | c | 0.0079681  | T->M | sp P38117 ETFB_HUMAN Electron transfer flavoprotein beta-subunit (Beta-ETF)                                                               |
| 1130653 | 108 | 1  | 66  | 12 | c | t | c | t | 0          | S->F | glycyl tRNA synthetase [Homo sapiens]                                                                                                     |
| 1130729 | 78  | 16 | 18  | 10 | a | g | a | g | 0.02439119 | N->S | carboxyl terminal LIM domain protein [Homo sapiens]                                                                                       |
| 1130732 | 28  | 6  | 40  | 2  | c | t | c | t | 0.03107253 | S->F | unnamed protein product [Homo sapiens]                                                                                                    |



|         |     |    |     |    |   |   |   |   |            |      |                                                                                                     |
|---------|-----|----|-----|----|---|---|---|---|------------|------|-----------------------------------------------------------------------------------------------------|
| 1130760 | 11  | 5  | 22  | 2  | g | a | a | g | 0.00010019 | G->S | T cell secreted protein                                                                             |
| 1130863 | 130 | 63 | 158 | 33 | c | g | c | g | 6.68E-06   | S->C | gb AAA59847.1  exons 2-8                                                                            |
| 1130993 | 184 | 4  | 166 | 10 | a | c | a | c | 0.00110577 | H->P | apolipoprotein J precursor                                                                          |
| 1130995 | 93  | 16 | 91  | 25 | g | a | g | a | 0.03818013 | E->K | MHC class I antigen Mamu B*06                                                                       |
| 1131000 | 108 | 22 | 116 | 12 | a | c | a | c | 0.02394553 | R->S | MHC class I antigen Mamu B*06                                                                       |
| 1131119 | 110 | 33 | 23  | 13 | c | t | c | t | 0          | T->I | gb AAA59847.1  exons 2-8                                                                            |
| 1131165 | 100 | 34 | 14  | 14 | c | g | c | g | 0.00745082 | L->V | gb AAA19928.1  HLA-B71 variant                                                                      |
| 1131525 | 302 | 2  | 200 | 6  | t | c | t | c | 6.33E-05   | M->T | gb AAC52278.1  non-muscle myosin light chain 3                                                      |
| 1131665 | 32  | 10 | 21  | 15 | a | g | a | g | 0.04797272 | Q->R | gb AAB80686.1  interferon regulatory factor 7A [Homo sapiens]                                       |
| 1132128 | 36  | 2  | 12  | 4  | a | g | a | g | 0.04953931 | E->G | hypothetical protein [Homo sapiens]                                                                 |
| 1132182 | 42  | 2  | 18  | 10 | c | g | c | g | 0.00080806 | R->G | sp Q9NPD3 RR41_HUMAN Exosome complex exonuclease RRP41 (Ribosomal RNA processing protein 41) (p12A) |
| 1136480 | 81  | 42 | 51  | 51 | t | c | t | c | 0.0008341  | V->A | Unknown protein product CIT987SK-A-589H1_1 splice form 1 [Homo sapiens]                             |
| 1136581 | 131 | 5  | 34  | 2  | c | g | c | g | 0          | R->G | proteasome activator 28-beta; MCP activator, 31-kD subunit; 11S regulator complex beta subunit;     |
| 1136633 | 71  | 25 | 135 | 19 | c | t | c | t | 0.00011746 | T->M | class II histocompatibility antigen HLA-DR beta-1 chain precursor (clone LS1.1.1) - human           |
| 1136692 | 89  | 35 | 30  | 0  | c | a | c |   | 0.00016461 | A->D | unnamed protein product [Homo sapiens]                                                              |
| 1136695 | 98  | 54 | 21  | 16 | g | a | g | a | 0          | M->I | unnamed protein product [Homo sapiens]                                                              |
| 1136791 | 62  | 14 | 46  | 8  | a | g | a | c | 0.00142903 | K->E | MHC class II antigen [Bos taurus]                                                                   |
| 1136795 | 28  | 18 | 19  | 11 | t | g | g | t | 0.02292948 | S->A | Chain B, Crystal Structure Of Staphylococcal Enterotoxin H In Complex With Human Mhc Class Ii       |
| 1136903 | 103 | 67 | 115 | 37 | c | t | c | t | 0.00016353 | P->L | unnamed protein product [Homo sapiens]                                                              |
| 1136949 | 178 | 35 | 172 | 13 | a | g | a | g | 0.00059052 | I->V | MHC class I antigen [Homo sapiens]                                                                  |
| 1137127 | 157 | 19 | 126 | 32 | g | a | g | a | 0.00013494 | R->K | MHC class I antigen [Homo sapiens]                                                                  |
| 1137160 | 135 | 34 | 130 | 13 | g | c | g | c | 0.00108031 | K->N | MHC class I antigen [Homo sapiens]                                                                  |
| 1138693 | 22  | 12 | 16  | 2  | c | t | c | t | 0.04742779 | P->L | Similar to RIKEN cDNA 0610039C21 gene [Homo sapiens]                                                |
| 1139496 | 67  | 1  | 43  | 5  | g | a | g | a | 2.74E-07   | S->N | interferon, alpha-inducible protein (clone IFI-15K);                                                |
| 1139915 | 147 | 1  | 64  | 4  | t | g | t | g | 1.64E-07   | M->R | gb AAB50544.1  spermidine/spermine N-acetyltransferase                                              |
| 1139971 | 25  | 3  | 14  | 0  | g | a | a |   | 1.29E-08   | V->I | gb AAH01821.1  Kangai 1 [Homo sapiens]                                                              |
| 1140343 | 20  | 8  | 30  | 28 | c | a | c | a | 0.00103457 | H->Q | human leukocyte antigen-DQ beta chain [Homo sapiens]                                                |
| 1200709 | 21  | 9  | 14  | 4  | a | c | c | a | 0.00141418 | N->K | unnamed protein product [Homo sapiens]                                                              |
| 1260794 | 24  | 4  | 8   | 4  | c | t | t | c | 0.0018141  | R->S | hypothetical protein (L1H 3- region) - human                                                        |

|         |     |     |     |    |   |   |   |   |            |      |                                                                                                                 |
|---------|-----|-----|-----|----|---|---|---|---|------------|------|-----------------------------------------------------------------------------------------------------------------|
| 1264457 | 65  | 37  | 12  | 8  | t | c | c | t | 0.02937716 | R->G | major histocompatibility complex, class I, E precursor; HLA class I histocompatibility antigen, E alpha chain   |
| 1286275 | 32  | 2   | 6   | 4  | g | a | g | a | 0.01668921 | P->L | similar to putative p150 [Homo sapiens]                                                                         |
| 1701296 | 133 | 105 | 84  | 52 | c | a | a | c | 4.01E-05   | T->M | Similar to nitrogen fixation gene 1 (S. cerevisiae, homolog)                                                    |
| 1785323 | 57  | 15  | 35  | 3  | c | t | c | t | 0.04887397 | P->L | similar to HC6 [Homo sapiens]                                                                                   |
| 1794256 | 32  | 20  | 62  | 12 | g | a | g | a | 0.00010112 | P->T | similar to nuclear pore complex interacting protein                                                             |
| 1801046 | 29  | 11  | 13  | 11 | c | t | t | c | 0.02302258 | S->L | gb AAA51851.1  human complement C1r                                                                             |
| 1804905 | 38  | 6   | 14  | 10 | c | g | c | g | 0.00942086 | T->R | ZP3 [Homo sapiens]                                                                                              |
| 1823684 | 324 | 1   | 201 | 3  | g | t | g | t | 0.00272478 | G->S | similar to peptidylprolyl isomerase A (cyclophilin A) [Homo sapiens]                                            |
| 2067051 | 28  | 11  | 10  | 2  | g | a | a | g | 0.00096648 | V->I | unnamed protein product [Homo sapiens]                                                                          |
| 2073495 | 24  | 8   | 47  | 6  | c | g | c | g | 0.02374438 | D->E | neutrophil lactoferrin                                                                                          |
| 2152281 | 393 | 1   | 200 | 2  | g | a | g | a | 0.0376778  | P->L | similar to ribosomal protein L13a; 60S ribosomal protein L13a; 23 kD highly basic protein [Homo sapiens]        |
| 2157680 | 103 | 25  | 78  | 8  | c | g | c | g | 0.01794169 | N->K | MHC class I antigen [Homo sapiens]                                                                              |
| 2227351 | 25  | 17  | 20  | 10 | g | a | a | g | 0.01777093 | R->C | similar to hypothetical protein FLJ20958 [Homo sapiens]                                                         |
| 2229498 | 48  | 10  | 30  | 0  | a | g | a |   | 0.01156033 | Q->R | sp P10124 PGSG_HUMAN Secretory granule proteoglycan core protein precursor (Platelet proteoglycan core protein) |
| 2229780 | 47  | 15  | 10  | 10 | c | t | t | c | 0.02273476 | T->M | GP50 [Cricetulus griseus]                                                                                       |
| 2229781 | 47  | 15  | 10  | 8  | c | t | t | c | 0.01120432 | T->M | put. serine protease inhibitor                                                                                  |
| 2229782 | 45  | 15  | 10  | 8  | c | t | t | c | 0.01362951 | T->M | put. serine protease inhibitor                                                                                  |
| 2230061 | 32  | 8   | 12  | 10 | c | t | c | t | 0.02689449 | R->W | cathepsin S [Homo sapiens]                                                                                      |
| 2230231 | 23  | 9   | 43  | 2  | c | a | c | a | 0.00048787 | A->D | sp P59665 DEF1_HUMAN Neutrophil defensin 1 precursor (HNP-1) (HP-1) (HP1) (Defensin, alpha 1)                   |
| 2235587 | 61  | 25  | 18  | 2  | t | c | t | c | 0.04968602 | H->R | Similar to proteasome (prosome, macropain) inhibitor subunit 1 (PI31) [Homo sapiens]                            |
| 2255607 | 14  | 12  | 7   | 1  | c | t | t | c | 0.04162875 | G->S | KIAA1279 protein [Homo sapiens]                                                                                 |
| 2275848 | 38  | 14  | 12  | 0  | t | g | t |   | 0.03696459 | D->A | gb AAP35828.1  ninjurin 1 [Homo sapiens]                                                                        |
| 2289247 | 22  | 20  | 20  | 6  | c | t | c | t | 0.0270264  | V->M | E2IG3 [Homo sapiens]                                                                                            |
| 2290766 | 41  | 5   | 3   | 1  | g | c | c | g | 0.01021277 | G->R | gb AAL85336.1 AF478457_1 ATP-dependent RNA helicase                                                             |
| 2293079 | 36  | 6   | 28  | 0  | c | t | c |   | 0.04000874 | P->L | unnamed protein product [Homo sapiens]                                                                          |
| 2295322 | 34  | 34  | 14  | 0  | a | g | g |   | 0.00021937 | R->G | CDA04 [Homo sapiens]                                                                                            |
| 2419108 | 39  | 7   | 8   | 6  | c | t | t | c | 0.00302166 | V->I | sp Q14692 BMS1_HUMAN Ribosome biogenesis protein BMS1 homolog                                                   |
| 2430028 | 127 | 1   | 51  | 3  | g | t | g | t | 6.91E-05   | P->T | similar to ribosomal protein S26 [Mus musculus]                                                                 |
| 2507990 | 60  | 30  | 18  | 7  | a | t | t | a | 0.00050083 | E->V | MHC class I protein HLA-C heavy chain                                                                           |

|         |     |    |     |    |   |   |   |   |            |      |                                                                                       |
|---------|-----|----|-----|----|---|---|---|---|------------|------|---------------------------------------------------------------------------------------|
| 2523956 | 155 | 19 | 95  | 49 | c | a | c | a | 1.11E-16   | A->S | MHC class I antigen [Pan troglodytes]                                                 |
| 2598303 | 23  | 15 | 28  | 4  | t | c | t | c | 0.00876356 | D->G | similar to retinitis pigmentosa 9 homolog; Pim-1 associated protein [Homo sapiens]    |
| 2732417 | 71  | 1  | 6   | 2  | c | t | c | t | 0.02453749 | P->L | similar to putative methyltransferase [Homo sapiens]                                  |
| 2767468 | 30  | 26 | 8   | 2  | a | g | g | a | 0.04268392 | W->R | gb AAH09938.1 AAH09938 Unknown (protein for MGC:12647) [Homo sapiens]                 |
| 2767471 | 31  | 18 | 4   | 0  | c | a | a |   | 0.02498079 | A->S | gb AAH09938.1 AAH09938 Unknown (protein for MGC:12647) [Homo sapiens]                 |
| 2848157 | 14  | 6  | 38  | 3  | g | a | g | c | 6.80E-05   | G->D | gb AAA58993.1  immunoglobulin kappa chain                                             |
| 2986576 | 36  | 17 | 4   | 0  | c | t | t |   | 0.01515152 | A->T | similar to KIAA1273 protein [Homo sapiens]                                            |
| 3087615 | 69  | 3  | 37  | 5  | c | a | c | a | 0.01260584 | E->D | Unknown (protein for MGC:20582) [Homo sapiens]                                        |
| 3087989 | 399 | 5  | 355 | 9  | c | a | c | a | 0.03331404 | V->F | gb AAM82753.1  BJ-HCC-24 tumor antigen [Homo sapiens]                                 |
| 3168891 | 48  | 2  | 2   | 2  | c | a | c | a | 0.02324103 | S->R | unnamed protein product [Homo sapiens]                                                |
| 3176950 | 31  | 24 | 23  | 9  | a | g | g | a | 0.00698811 | K->R | gb AAA36312.1  SB-beta chain                                                          |
| 3177751 | 59  | 47 | 11  | 5  | c | t | t | c | 0.04216303 | T->M | sp P38117 ETFB_HUMAN Electron transfer flavoprotein beta-subunit (Beta-ETF)           |
| 3177809 | 63  | 1  | 4   | 2  | c | t | c | t | 0.01753745 | A->V | sp P46695 EX1_HUMAN Radiation-inducible                                               |
| 3179039 | 12  | 2  | 2   | 0  | t | c | c |   | 0.05       | I->T | pregnancy-specific glycoprotein beta-1 precursor - human                              |
| 3179218 | 25  | 15 | 8   | 0  | t | a | t |   | 0.03679394 | F->Y | MHC class II antigen HLA DR52 [Homo sapiens]                                          |
| 3179771 | 67  | 13 | 87  | 5  | g | a | g | a | 0.00527909 | R->Q | lymphocyte antigen                                                                    |
| 3180263 | 183 | 2  | 41  | 3  | t | c | t | c | 0.0002398  | F->S | similar to heterogeneous nuclear ribonucleoprotein C (C1/C2) [Homo sapiens]           |
| 3180956 | 55  | 3  | 28  | 8  | c | t | c | t | 0.01352378 | S->F | Probable ribosome biogenesis protein NEP1 (C2f protein)                               |
| 3180961 | 264 | 51 | 214 | 18 | t | g | t | g | 0.00051614 | F->L | acidic ribosomal phosphoprotein PO [Bos taurus]                                       |
| 3188792 | 281 | 5  | 108 | 6  | c | g | c | g | 0.00426836 | R->G | similar to 60S ribosomal protein L15 [Mus musculus]                                   |
| 3189320 | 29  | 1  | 2   | 2  | c | t | t | c | 0.03008021 | A->V | gb AAB31966.1  antiquitin [Homo sapiens]                                              |
| 3191517 | 109 | 2  | 42  | 6  | a | c | a | c | 2.65E-08   | T->P | gb AAB94642.1  deoxyuridine triphosphate nucleotidohydrolase precursor [Homo sapiens] |
| 3193130 | 237 | 2  | 143 | 5  | g | a | g | a | 0.00069717 | E->K | similar to ribosomal protein S12 [Bos taurus]                                         |
| 3194286 | 32  | 8  | 58  | 6  | g | a | g | a | 0.03619921 | S->N | keratin K5                                                                            |
| 3199701 | 47  | 17 | 16  | 0  | t | c | t |   | 0.01359122 | V->A | ADP-ribosyltransferase (NAD+; poly (ADP-ribose) polymerase) [Homo sapiens]            |
| 3199753 | 379 | 7  | 143 | 13 | g | c | g | c | 1.08E-09   | A->P | 60S ribosomal protein L13A                                                            |
| 3200107 | 151 | 5  | 16  | 0  | c | a | c |   | 0          | R->S | gb AAA59612.1  HLA-A30.3 precursor                                                    |
| 3200126 | 275 | 2  | 203 | 7  | a | c | a | c | 7.94E-06   | H->P | sp P02433 RL32_HUMAN 60S ribosomal protein L32 pir  R5HU32 ribosomal prot             |

|         |     |    |     |    |   |   |   |   |            |      |                                                                              |
|---------|-----|----|-----|----|---|---|---|---|------------|------|------------------------------------------------------------------------------|
| 3200132 | 84  | 70 | 18  | 16 | a | g | g | a | 0          | Q->R | HLA-A74 [Homo sapiens]                                                       |
| 3200522 | 263 | 1  | 181 | 9  | a | c | a | c | 0          | H->P | sp P02433 RL32_HUMAN 60S ribosomal protein L32 pir  R5HU32 ribosomal prot    |
| 3201368 | 215 | 7  | 116 | 16 | c | t | c | t | 3.90E-09   | S->F | ribosomal protein L35 [Mus musculus]                                         |
| 3201397 | 226 | 6  | 138 | 8  | g | a | g | a | 0.02807998 | E->K | Similar to tubulin, beta 5 [Mus musculus]                                    |
| 3202446 | 240 | 4  | 145 | 6  | a | c | a | c | 0.02420268 | H->P | ribosomal protein L17 [Mus musculus]                                         |
| 3205367 | 234 | 2  | 114 | 4  | a | g | a | g | 0.00262204 | E->G | ribosomal protein, large P2 [Mus musculus]                                   |
| 3205529 | 232 | 4  | 51  | 3  | c | t | c | t | 0.0285276  | L->F | gb AAP36043.1  ribosomal protein L8 [Homo sapiens]                           |
| 3205759 | 290 | 4  | 136 | 9  | a | g | a | g | 4.83E-07   | K->R | sp P47914 RL29_HUMAN 60S riboso                                              |
| 3205903 | 13  | 1  | 2   | 0  | c | t | t |   | 0.025      | T->M | gb AAA52590.1  pregnancy-specific beta-1-glycoprotein                        |
| 3207506 | 59  | 7  | 47  | 11 | c | a | c | a | 0.04075509 | N->K | gb AAH39951.1  8430423A01Rik protein [Mus musculus]                          |
| 3207803 | 195 | 3  | 50  | 8  | c | t | c | t | 2.05E-14   | P->L | Unknown (protein for IMAGE:3349601) [Homo sapiens]                           |
| 3208406 | 32  | 6  | 24  | 0  | a | g | a |   | 0.04490773 | Y->H | gb AAD34097.1 AF151860_1 CGI-102 protein                                     |
| 3209329 | 105 | 1  | 52  | 6  | a | c | a | c | 1.36E-13   | H->P | Homo sapiens ubiquitin-like 5 [synthetic construct]                          |
| 3209388 | 236 | 8  | 178 | 0  | a | g | a |   | 0.01429411 | E->G | similar to ribosomal protein S6 [Mus musculus]                               |
| 3209921 | 82  | 4  | 6   | 4  | c | t | c | t | 0.00336307 | L->F | Lamins C and C2 dbj BAA08570.1  lamin C [Mus musculus domesticus]            |
| 3210169 | 96  | 2  | 50  | 4  | c | g | c | g | 0.00543329 | T->R | thyroid hormone binding protein precursor                                    |
| 3210196 | 222 | 19 | 226 | 2  | a | c | a | c | 8.99E-05   | T->P | Homo sapiens ferritin, light polypeptide                                     |
| 3210235 | 310 | 9  | 221 | 3  | a | t | a | g | 0.01148775 | I->F | similar to 40S ribosomal protein S2 [Rattus norvegicus]                      |
| 3210432 | 58  | 6  | 6   | 4  | t | g | t | g | 0.02191601 | L->R | similar to hypothetical protein FLJ10661 [Homo sapiens]                      |
| 3210532 | 68  | 4  | 8   | 4  | g | t | g | t | 0.01168137 | V->F | Chain C, Ligand Binding Alters The Structure And Dynamics Of Nucleosomal Dna |
| 3210688 | 71  | 13 | 62  | 4  | c | t | c | t | 0.03666189 | A->V | Unknown (protein for MGC:52000) [Homo sapiens]                               |
| 3210910 | 28  | 2  | 27  | 9  | g | a | g | a | 0.03812772 | R->H | Unknown (protein for IMAGE:3140944) [Homo sapiens]                           |
| 3210961 | 164 | 2  | 6   | 6  | g | c | c | g | 0          | Q->H | epsilon-COP [Homo sapiens]                                                   |
| 3211002 | 299 | 7  | 154 | 10 | c | t | c | t | 0.00112302 | S->F | gb AAA75449.1  L10 ribosomal protein                                         |
| 3211239 | 164 | 2  | 146 | 8  | a | g | a | g | 5.78E-06   | D->G | gb AAH00533.1 AAH00533 Similar to eukaryotic translation initiation factor 3 |
| 3211570 | 267 | 3  | 167 | 7  | g | c | g | c | 0.00025171 | A->P | similar to ribosomal protein L13, cytosolic [validated]                      |
